# Supplementary material for: PAX8 and MECOM are interaction partners driving ovarian cancer
Source: PubMed Central journal article supplement (PMC8076227; doi:10.1038/s41467-021-22708-w), 2021-04-26
Supplement: 41467_2021_22708_MOESM3_ESM.pdf [file 41467_2021_22708_MOESM3_ESM.pdf]

## **Description of Additional Supplementary Files**

File Name: Supplementary Data 1

Description: Proteins identified in PAX8 BioID-MS experiment

File Name: Supplementary Data 2

Description: Inter and Intra-molecular crosslinks identified in PAX8-PRDM3 crosslinking-MS experiment

File Name: Supplementary Data 3

Description: ChIP-seq peaks for PAX8, PRDM3 and signal modulation upon reciprocal knockdown

File Name: Supplementary Data 4

Description: Full RNA-seq dataset

File Name: Supplementary Data 5

Description: SYBR green and Taqman probes used
