# Supplementary material for: PAX8 and MECOM are interaction partners driving ovarian cancer
Source: PubMed Central journal article supplement (PMC8076227; doi:10.1038/s41467-021-22708-w), 2021-04-26
Supplement: 41467_2021_22708_MOESM9_ESM.pdf [file 41467_2021_22708_MOESM9_ESM.pdf]

## Reporting Summary

Nature Research wishes to improve the reproducibility of the work that we publish. This form provides structure for consistency and transparency in reporting. For further information on Nature Research policies, see our [Editorial Policies](#) and the [Editorial Policy Checklist](#).

### Statistics

For all statistical analyses, confirm that the following items are present in the figure legend, table legend, main text, or Methods section.

n/a Confirmed

- The exact sample size ( $n$ ) for each experimental group/condition, given as a discrete number and unit of measurement
- A statement on whether measurements were taken from distinct samples or whether the same sample was measured repeatedly
- The statistical test(s) used AND whether they are one- or two-sided  
*Only common tests should be described solely by name; describe more complex techniques in the Methods section.*
- A description of all covariates tested
- A description of any assumptions or corrections, such as tests of normality and adjustment for multiple comparisons
- A full description of the statistical parameters including central tendency (e.g. means) or other basic estimates (e.g. regression coefficient) AND variation (e.g. standard deviation) or associated estimates of uncertainty (e.g. confidence intervals)
- For null hypothesis testing, the test statistic (e.g.  $F$ ,  $t$ ,  $r$ ) with confidence intervals, effect sizes, degrees of freedom and  $P$  value noted  
*Give  $P$  values as exact values whenever suitable.*
- For Bayesian analysis, information on the choice of priors and Markov chain Monte Carlo settings
- For hierarchical and complex designs, identification of the appropriate level for tests and full reporting of outcomes
- Estimates of effect sizes (e.g. Cohen's  $d$ , Pearson's  $r$ ), indicating how they were calculated

*Our web collection on [statistics for biologists](#) contains articles on many of the points above.*

### Software and code

Policy information about [availability of computer code](#)

|                 |                                                                                                                                                                                                                                                                               |
|-----------------|-------------------------------------------------------------------------------------------------------------------------------------------------------------------------------------------------------------------------------------------------------------------------------|
| Data collection | Standard software from manufacturers (Illumina Inc. and Thermo Scientific) for NGS-based and Mass Spectrometry-based data collection has been used (Proteome Discoverer version 2.1)                                                                                          |
| Data analysis   | Statistics were calculated by Microsoft Excel 2016, GraphPad Prism v.8 and standard Bioconductor R (v 4.0.3) packages. For NGS and MS data analysis, open source code have been used and listed in the material and methods. No proprietary code/software have been employed. |

For manuscripts utilizing custom algorithms or software that are central to the research but not yet described in published literature, software must be made available to editors and reviewers. We strongly encourage code deposition in a community repository (e.g. GitHub). See the Nature Research [guidelines for submitting code & software](#) for further information.

### Data

Policy information about [availability of data](#)

All manuscripts must include a [data availability statement](#). This statement should provide the following information, where applicable:

- Accession codes, unique identifiers, or web links for publicly available datasets
- A list of figures that have associated raw data
- A description of any restrictions on data availability

The Crosslinking\_MS data used in this study are available in the PRIDE database under accession code PXD021708 (<https://www.ebi.ac.uk/pride/archive/projects/PXD021708>). The BioID-MS data generated in this study have been deposited in the PRIDE database under accession code PXD021709 (<https://www.ebi.ac.uk/pride/archive/projects/PXD021709>). ChIP-seq and RNA-seq data have been deposited in SRA under accession PRJNA655844 (<https://www.ncbi.nlm.nih.gov/sra/?term=PRJNA655844>) and PRJNA655836 (<https://www.ncbi.nlm.nih.gov/sra/?term=PRJNA655836>) respectively. The remaining data are available within the Article, Supplementary Information or available from the authors upon request.

## Field-specific reporting

Please select the one below that is the best fit for your research. If you are not sure, read the appropriate sections before making your selection.

Life sciences       Behavioural & social sciences       Ecological, evolutionary & environmental sciences

For a reference copy of the document with all sections, see [nature.com/documents/nr-reporting-summary-flat.pdf](https://www.nature.com/documents/nr-reporting-summary-flat.pdf)

## Life sciences study design

All studies must disclose on these points even when the disclosure is negative.

|                 |                                                                                                                                                                                                                                                                                                                                                                                                                                                                                             |
|-----------------|---------------------------------------------------------------------------------------------------------------------------------------------------------------------------------------------------------------------------------------------------------------------------------------------------------------------------------------------------------------------------------------------------------------------------------------------------------------------------------------------|
| Sample size     | Experiments were performed using sample sizes based on standard protocols in the field. No statistical test was performed to predetermine sample size but to ensure the possibility of performing statistical tests at least 3 biological replicates were performed whenever possible. Experiments involving mouse xenografts, due to intrinsic higher variability were performed with at least 4 independent mice per group.                                                               |
| Data exclusions | No data were excluded.                                                                                                                                                                                                                                                                                                                                                                                                                                                                      |
| Replication     | All experiments were repeated at least for three times. Detailed information on replicates was available in the figure legends. All attempts to replicate the experiments performed here were successful.                                                                                                                                                                                                                                                                                   |
| Randomization   | Samples were processed in a randomized fashion.                                                                                                                                                                                                                                                                                                                                                                                                                                             |
| Blinding        | Data acquisition in the studies, including animal experiments, was conducted in a blinded manner. Briefly, large cohorts of mice were injected with the indicated cell lines and at a given timepoints groups were randomized to retain equal distribution of tumor volumes. For the other experiments, samples were all processed in parallel in a blind fashion by assigning numerical IDs to the samples so that the operator would not have pre-knowledge of the nature of the samples. |

## Reporting for specific materials, systems and methods

We require information from authors about some types of materials, experimental systems and methods used in many studies. Here, indicate whether each material, system or method listed is relevant to your study. If you are not sure if a list item applies to your research, read the appropriate section before selecting a response.

### Materials & experimental systems

| n/a                                 | Involved in the study                                     |
|-------------------------------------|-----------------------------------------------------------|
| <input type="checkbox"/>            | <input checked="" type="checkbox"/> Antibodies            |
| <input type="checkbox"/>            | <input checked="" type="checkbox"/> Eukaryotic cell lines |
| <input checked="" type="checkbox"/> | <input type="checkbox"/> Palaeontology and archaeology    |
| <input checked="" type="checkbox"/> | <input type="checkbox"/> Animals and other organisms      |
| <input checked="" type="checkbox"/> | <input type="checkbox"/> Human research participants      |
| <input checked="" type="checkbox"/> | <input type="checkbox"/> Clinical data                    |
| <input checked="" type="checkbox"/> | <input type="checkbox"/> Dual use research of concern     |

### Methods

| n/a                                 | Involved in the study                           |
|-------------------------------------|-------------------------------------------------|
| <input type="checkbox"/>            | <input checked="" type="checkbox"/> ChIP-seq    |
| <input checked="" type="checkbox"/> | <input type="checkbox"/> Flow cytometry         |
| <input checked="" type="checkbox"/> | <input type="checkbox"/> MRI-based neuroimaging |

## Antibodies

|                 |                                                                                                                                                                                                                                                                                                                                                                                            |
|-----------------|--------------------------------------------------------------------------------------------------------------------------------------------------------------------------------------------------------------------------------------------------------------------------------------------------------------------------------------------------------------------------------------------|
| Antibodies used | PAX8 CST 59019, PRDM3 (custom-made at Genscript using recombinant PRDM3 1-200 as antigen), Vinculin Sigma V9131, NanoLuc R&D systems MAB10026, EVI-1 CST 2593, Actin MAB1501, GAPDH CST 3683. For western blots, antibodies were used at dilutions stated in source data file. For ChIP-seq, PAX8 antibody was used at 1:10 dilution while PRDM3 antibody was used at 1.5ug/ChIP reaction. |
| Validation      | Antibodies were validated by RNAi targeting experiments or cell lines displaying differential expression as reported in figure S3C.                                                                                                                                                                                                                                                        |

## Eukaryotic cell lines

Policy information about [cell lines](#)

|                     |                                                                                    |
|---------------------|------------------------------------------------------------------------------------|
| Cell line source(s) | ATCC:<br>- NIH:OVCAR3<br>- COV318<br>- IGROV-1<br>- KURAMOCHI<br>- OVISE<br>- 293T |
|---------------------|------------------------------------------------------------------------------------|

- OV56  
- NCI-H1299

Authentication

Cell line identity was confirmed by regular SNP array genotyping

Mycoplasma contamination

Cell lines were regularly confirmed to be negative for mycoplasma contamination by PCR testing.

Commonly misidentified lines  
(See [ICLAC](#) register)

No commonly misidentified cell lines were used

## ChIP-seq

### Data deposition

Confirm that both raw and final processed data have been deposited in a public database such as [GEO](#).

Confirm that you have deposited or provided access to graph files (e.g. BED files) for the called peaks.

Data access links

*May remain private before publication.*

Search in SRA <https://www.ncbi.nlm.nih.gov/sra>  
- SRP276625 and BioProject PRJNA655836  
- SRP276627 and BioProject PRJNA655844  
Full list of peaks (BED file) are provided in Supplementary Data 3

Files in database submission

FastQ

Genome browser session  
(e.g. [UCSC](#))

N/A. Data from repository are freely accessible to generate BigWig files.

### Methodology

Replicates

Duplicates

Sequencing depth

>30 milion uniquely mapped reads

Antibodies

IgG Sigma I506 (1ug), PAX8 CST 59019 (1:10), Custom PRDM3 antibody (1.5 ug/ChIP), H3K27ac CST 8173 (1:20), H3K4me3 Millipore 07-473 (1ug), H3K27me3 CST 9733 (1:20)

Peak calling parameters

MACS2 mfold 5, fdr 10-E09

Data quality

FRIP score was calculated. For PAX8 >20000 peaks and for PRDM3 >6000 were identified with peak calling parameters described

Software

Standard software packages were employed.
